# Supplementary material for: Degradation and regeneration mechanisms of NiO protective layers deposited by ALD on photoanodes
Source: Royal Society of Chemistry journal article supplement (doi:10.1039/c9ta08638b), 2019-01-01
Supplement: c9ta08638b1.pdf [file c9ta08638b1.pdf]

# About Degradation and Regeneration Mechanisms of NiO Protective Layers Deposited by ALD on Photoanodes

Carles Ros,<sup>a,\*</sup> Teresa Andreu,<sup>a,b,\*</sup> Jérémy David,<sup>c</sup> Jordi Arbiol,<sup>c,d</sup> Joan R. Morante<sup>a,b</sup>

<sup>a</sup>Catalonia Institute for Energy Research (IREC). Jardins de les Dones de Negre 1, 08930 Sant Adrià del Besòs, Barcelona, Spain

<sup>b</sup>Universitat de Barcelona (UB), Martí i Franquès, 1, 08028 Barcelona, Spain

<sup>c</sup>Catalan Institute of Nanoscience and Nanotechnology (ICN2), CSIC and The Barcelona Institute of Science and Technology (BIST), Campus UAB, Bellaterra, 08193 Barcelona, Spain

<sup>d</sup>ICREA, Pg. Lluís Companys 23, 08010 Barcelona, Spain

## Supporting Information

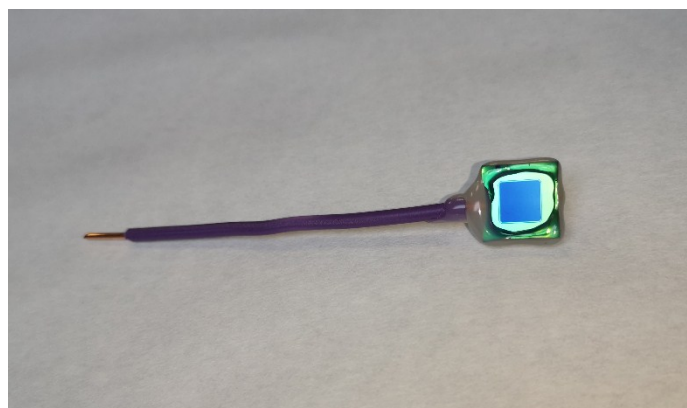

*Fig. S. 1: p<sup>+</sup>n-Si photoanode, where a 0.5 cm<sup>2</sup> active area (darker region) was lithographically defined by SiO<sub>2</sub> passivation on a silicon n-type wafer (0.1-0.5 ohm.cm resistivity), ALD-protected and further Ag paint soldered to a Cu wire and isolated with thermoplastic.*

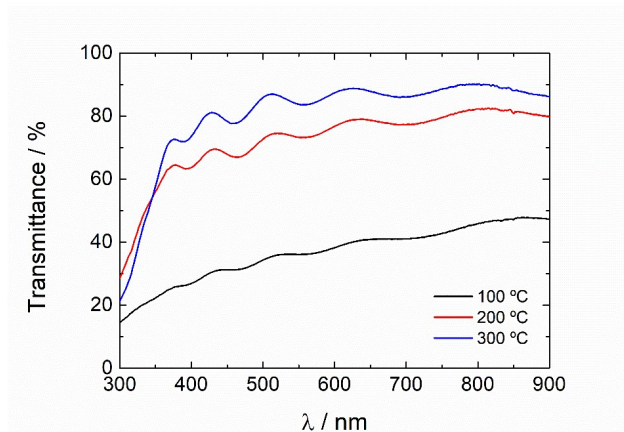

Fig S. 2: transmittance measurements of NiO layers grown at 100 (black), 200 (red) and 300 °C (blue) on top of glass substrates.

| <u><math>V</math> vs RHE</u> | <u><math>R1</math> / Ohm</u> | <u><math>R2</math> / Ohm</u> | <u><math>C2</math> / F</u> | <u><math>R3</math> / Ohm</u> | <u><math>CPE3-T / F \cdot S^{A3-1}</math></u> | <u><math>A3</math></u> |
|------------------------------|------------------------------|------------------------------|----------------------------|------------------------------|-----------------------------------------------|------------------------|
| <b>1.1</b>                   | 2.293                        | 426.9                        | 1.40E-06                   | 3.01E+18                     | 1.01E-04                                      | 0.83                   |
| <b>1.2</b>                   | 2.229                        | 428.9                        | 1.39E-06                   | 5.10E+11                     | 1.38E-04                                      | 0.83                   |
| <b>1.3</b>                   | 2.093                        | 419.1                        | 1.38E-06                   | 7244                         | 4.89E-04                                      | 0.76                   |
| <b>1.4</b>                   | 2.407                        | 430.1                        | 1.37E-06                   | 6.46E+11                     | 4.43E-04                                      | 0.87                   |
| <b>1.5</b>                   | 2.054                        | 430.5                        | 1.36E-06                   | 6104                         | 3.11E-04                                      | 0.88                   |
| <b>1.6</b>                   | 2.13                         | 371.1                        | 1.35E-06                   | 447.9                        | 2.74E-04                                      | 0.83                   |
| <b>1.7</b>                   | 2.223                        | 246.1                        | 1.32E-06                   | 179.2                        | 2.39E-04                                      | 0.82                   |
| <b>1.8</b>                   | 2.366                        | 144.7                        | 1.25E-06                   | 97.5                         | 1.93E-04                                      | 0.85                   |
| <b>1.9</b>                   | 1.822                        | 82.2                         | 1.19E-06                   | 56.59                        | 2.05E-04                                      | 0.85                   |

Table S. 1: EIS fitted values of Fig. 6a using the modelled circuit presented in Fig. 6a (inset).

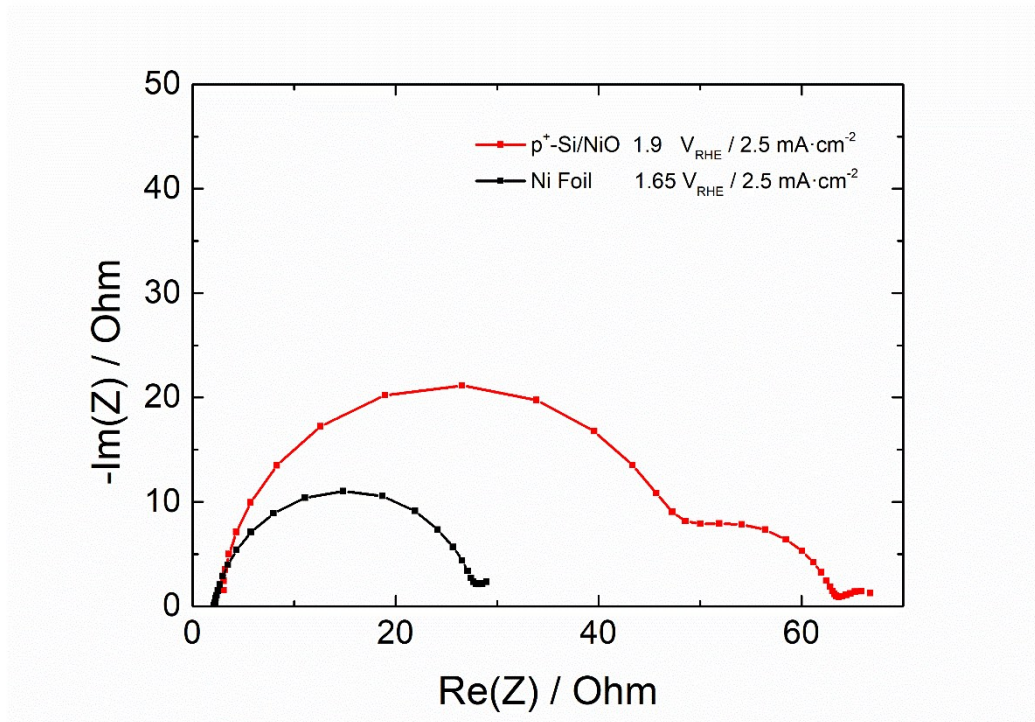

*Fig. S. 3: EIS measurements of a Ni Foil and a protected  $\text{p}^+\text{-Si}$  with  $100 \text{ }^\circ\text{C}$  NiO by ALD at similar current values and thus, at different potential using the modelled circuit presented in Fig. 6a (inset). Results are presented in Table S. 2.*

| <u>t / h</u>                     | <u>R1 / Ohm</u> | <u>R2 / Ohm</u> | <u>C2 / F</u> | <u>R3 / Ohm</u> | <u>CPE3-T / F·S<sup>A3-1</sup></u> | <u>A3</u> |
|----------------------------------|-----------------|-----------------|---------------|-----------------|------------------------------------|-----------|
| <i>Ni Foil</i>                   | 2.15            | 0               | 0             | 26.04           | 8.92E-04                           | 0.89      |
| <b>100 °C NiO p<sup>+</sup>-</b> |                 |                 |               |                 |                                    |           |
| <i>Si</i>                        | 2.99            | 41.96           | 1.16E-06      | 18.9            | 3.80E-04                           | 0.78      |

Table S. 2: EIS fitted values of Fig. S. 3 using the modelled circuit presented in Fig. 6a (inset).

| <u>t / h</u> | <u>R1 / Ohm</u> | <u>R2 / Ohm</u> | <u>C2 / F</u> | <u>R3 / Ohm</u> | <u>CPE3-T / F·S<sup>A3-1</sup></u> | <u>A3</u> |
|--------------|-----------------|-----------------|---------------|-----------------|------------------------------------|-----------|
| <b>0</b>     | 2.9             | 41.9            | 1.16E-06      | 18.9            | 3.80E-04                           | 0.78      |
| <b>1</b>     | 3.6             | 52.8            | 1.16E-06      | 36.3            | 2.63E-04                           | 0.78      |
| <b>3</b>     | 3.5             | 54.3            | 1.14E-06      | 35.8            | 2.48E-04                           | 0.79      |
| <b>6</b>     | 3.6             | 55.2            | 1.14E-06      | 35.7            | 2.51E-04                           | 0.79      |
| <b>9</b>     | 3.8             | 57.1            | 1.13E-06      | 35.3            | 2.36E-04                           | 0.80      |
| <b>12</b>    | 3.6             | 55.7            | 1.16E-06      | 34.3            | 2.46E-04                           | 0.80      |
| <b>15</b>    | 4.0             | 59.7            | 1.12E-06      | 37.1            | 2.41E-04                           | 0.79      |
| <b>18</b>    | 3.5             | 57.7            | 1.18E-06      | 35.8            | 2.56E-04                           | 0.78      |
| <b>21</b>    | 3.7             | 56.8            | 1.14E-06      | 33.8            | 2.40E-04                           | 0.79      |
| <b>24</b>    | 3.8             | 56.1            | 1.13E-06      | 32.8            | 2.45E-04                           | 0.79      |

Table S. 3: EIS fitted values of Fig. 6c using the modelled circuit presented in Fig. 6a (inset).

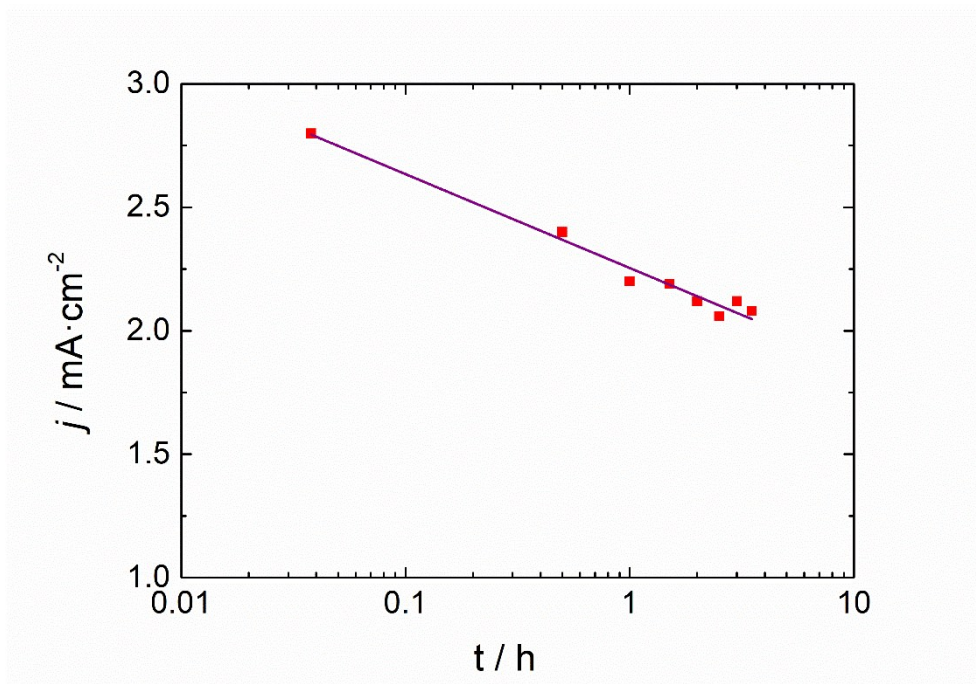

*Fig. S. 4: Stability measurement of the same sample represented in Fig. 6b in a logarithmic time scale and the correspondent fitting of the measured values, polarized at 1.9 V vs RHE in 1 M KOH.*

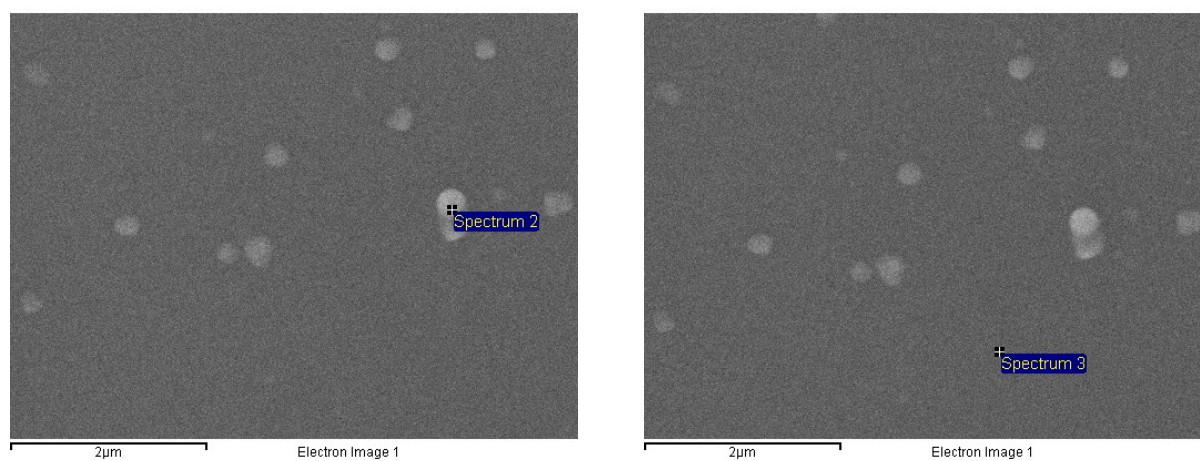

*Fig. S. 5: selected spots where the EDX measurements presented in Table S.1 were performed.*

| Spectrum 2  |              |              | Spectrum 3  |             |              |
|-------------|--------------|--------------|-------------|-------------|--------------|
| Element     | Weight%      | Atomic%      | Element     | Weight%     | Atomic%      |
| C K         | 15.84        | 28.17        | C K         | 30.38       | 48.55        |
| <b>O K</b>  | <b>15.34</b> | <b>20.49</b> | <b>O K</b>  | <b>8.57</b> | <b>10.28</b> |
| F K         | 7.06         | 7.94         | F K         | 1.73        | 1.75         |
| Al K        | 0.29         | 0.23         | Al K        | 0.00        | 0.00         |
| Si K        | 52.31        | 39.79        | Si K        | 56.13       | 38.36        |
| S K         | 0.14         | 0.10         | S K         | 0.08        | 0.05         |
| <b>Ni K</b> | <b>9.01</b>  | <b>3.28</b>  | <b>Ni K</b> | <b>3.12</b> | <b>1.02</b>  |
| Totals      | 100.00       |              | Totals      | 100.00      |              |

Table S. 4: EDX quantifications of spots selected in Fig. S. 5, presenting significant extra Ni and O where bumps are visible by SEM.

(a)

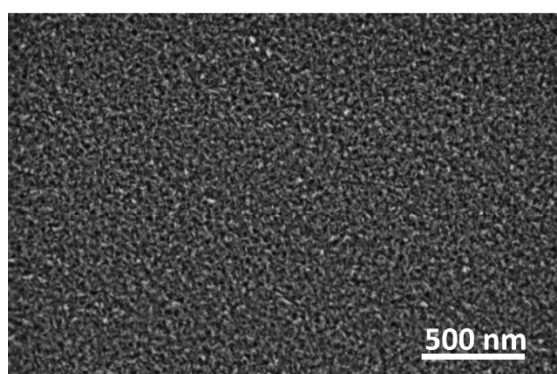

(b)

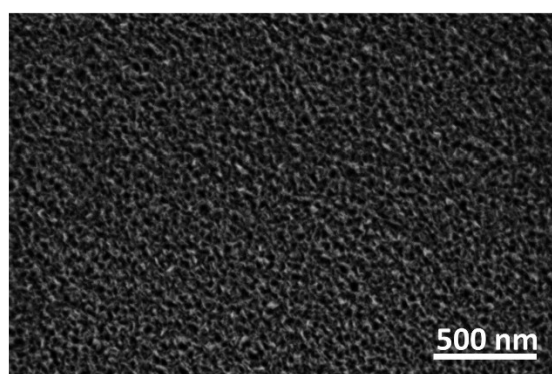

Fig. S. 6: SEM images of NiO layers grown on top of Si at deposition temperatures of 200 °C (left) and 300 °C (right) after 100 cycles between 1.1 and 2 V vs RHE in 1 M KOH electrolyte in dark conditions. No morphology changes can be seen.

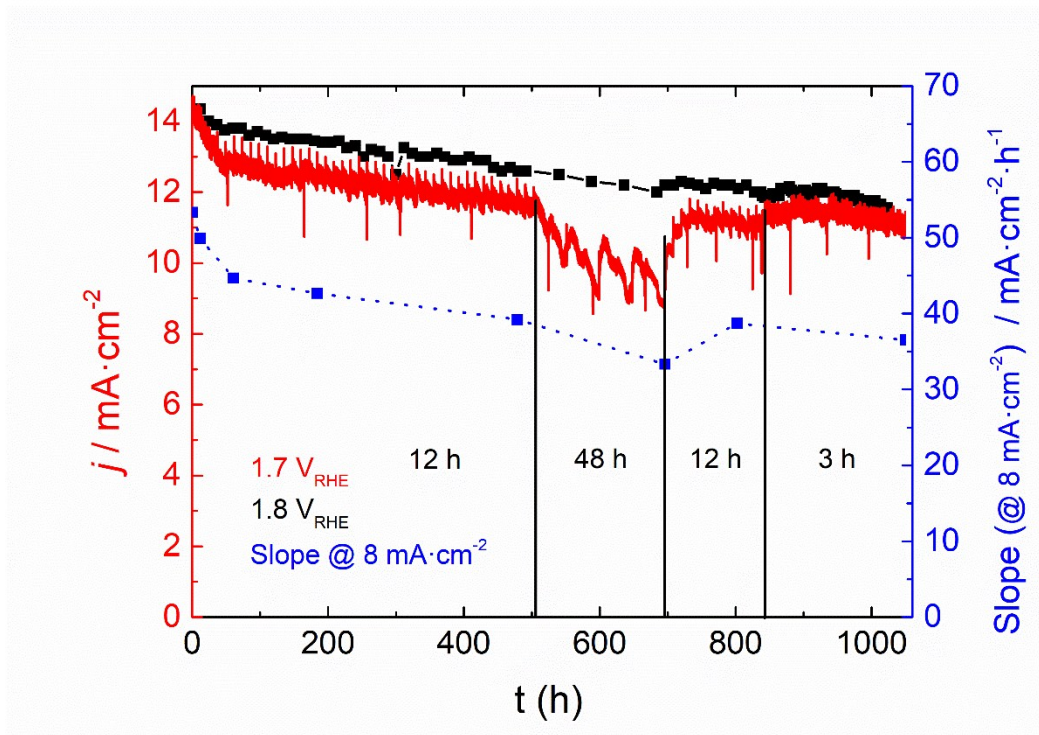

Fig. S. 7:  $p^+n$ -Si photoanode protected with NiO deposited at 100 °C and measured under 1 sun illumination in 1 M KOH. red) 1000 h stability measurement at 1.7 V vs RHE cycled 6 times every 12, 48 or 3h. black) measured current density at more anodic potential (1.8 V vs RHE), where the current density is limited by the number of minority carriers photogenerated in the  $p$ - $n$  junction.

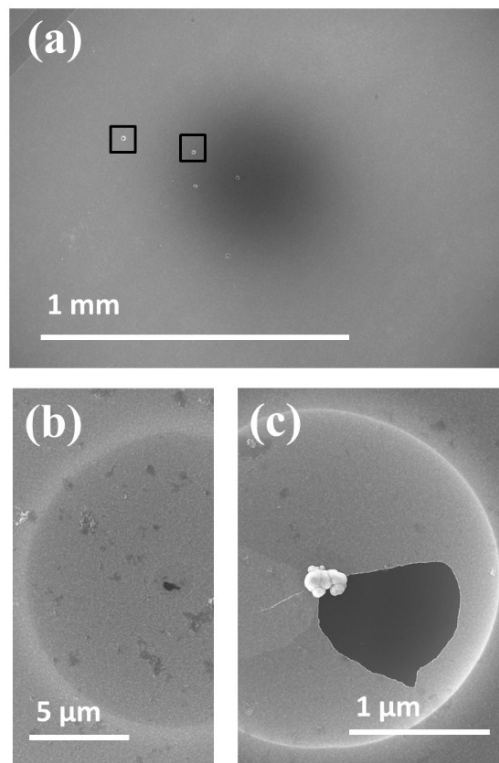

*Fig. S. 8: a) SEM top view image of the  $n^+p$ -Si photoanode NiO protected at 100 °C presenting very few etched regions. Zoom in two of the etching regions, where b) a few tens of nanometers hole can be seen and c) a particle is present, both probable fabrication defects of the NiO layer allowing KOH to etch the silicon beneath*
